# Supplementary material for: Enhanced reverse saturable absorption of electrostatic self-assembled layer by layer films containing (8-quinolineoxy-5-sulfonic acid)phthalocyanine cobalt and graphene oxide
Source: Royal Society of Chemistry journal article supplement (doi:10.1039/c5ra04988a), 2015-01-01
Supplement: c5ra04988a1.pdf [file c5ra04988a1.pdf]

### Electronic Supplementary Information

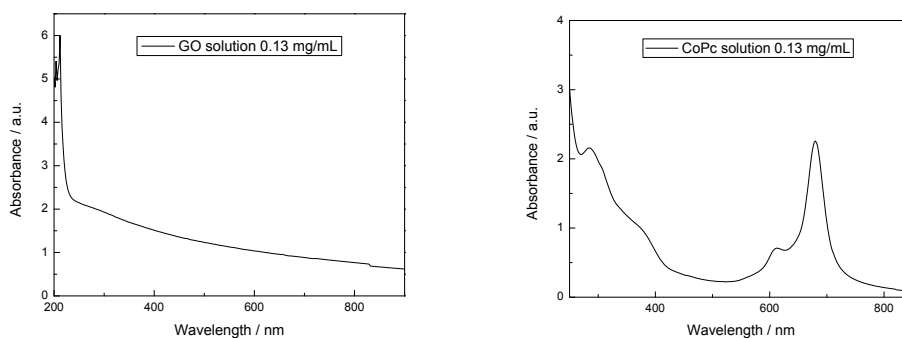

Fig. S1 UV-Vis spectra of 0.13 mg/mL CoPc and 0.13 mg/mL GO aqueous solution.

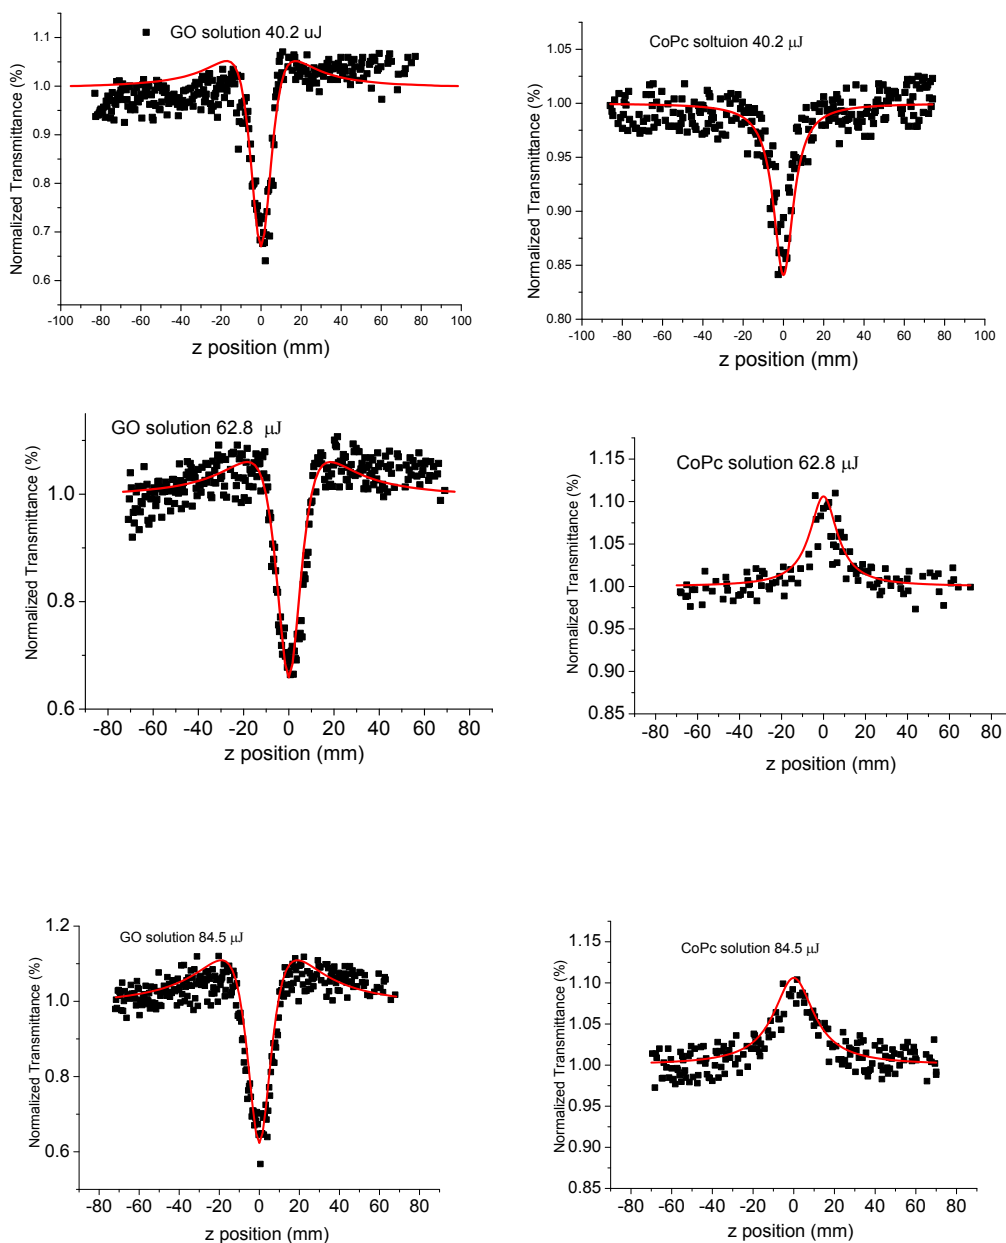

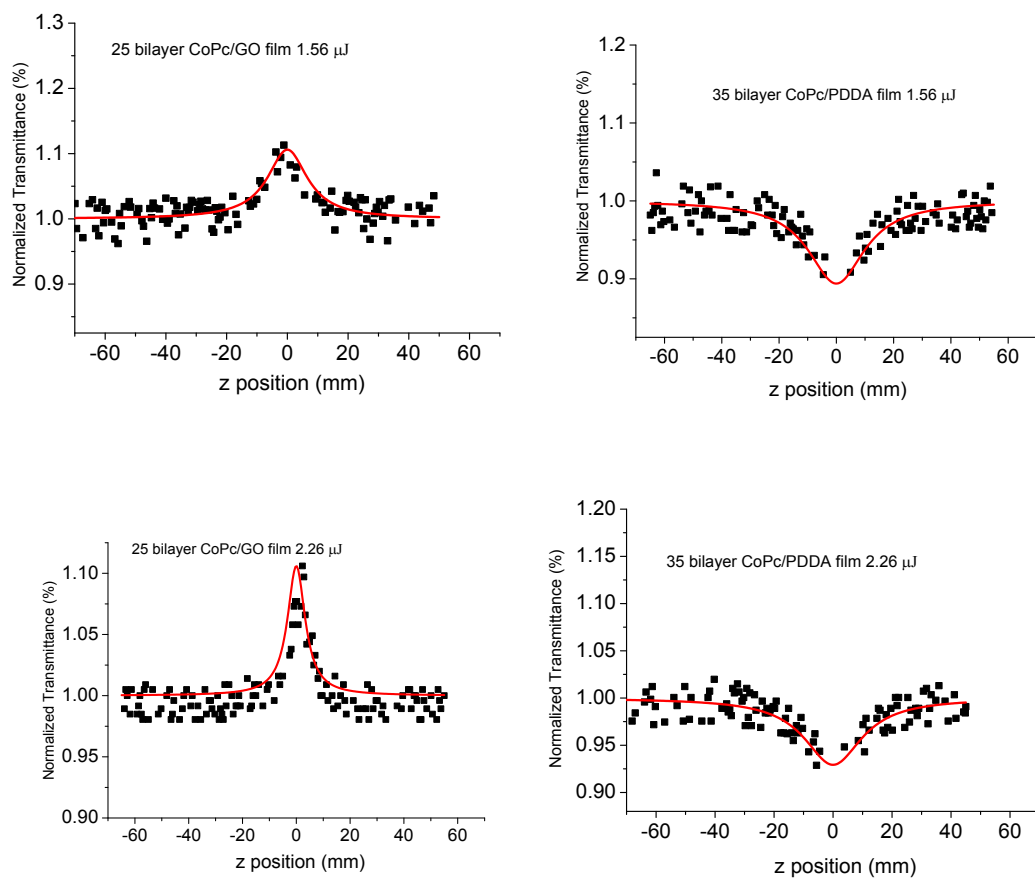

Fig. S2 The normalized transmittance curves (open aperture) of 0.13 mg/mL GO solution, 0.13 mg/mL CoPc solution, and the composite films.

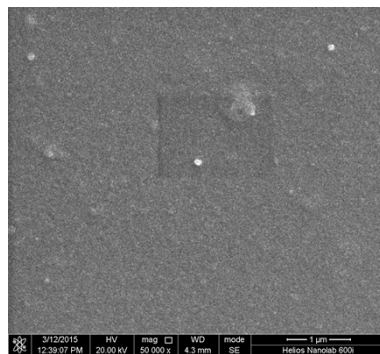

Fig. S3 The SEM image of the 35 bilayer CoPc/PDDA film
